# Supplementary material for: Copses are suitable for initial movement of common frog (Rana temporaria) in intensively utilised agricultural landscape
Source: Research Square preprint supplement (doi:10.21203/rs.3.rs-7804887/v1), 2025-11-24
Supplement: Supplementary file 1 [file 14116e5f1cbc3685cddb214e.xlsx]

## Sheet: Table S1
Tab. S1a: Model comparison for trappings at pond banks for the night period (n = 94) and the day period (n = 92) of 2019.
Delta AIC, Akaike weight and R² are shown for each combination of abiotic variables.
Night period							Day period
Temp.	Hum.	Δ(AIC)	w(AIC)	adj. R²	Comment		Temp.	Hum.	Δ(AIC)	w(AIC)	adj. R²	Comment
min	mean	0.0	0.845	0.33	ok		max	mean	0.0	0.254	0.14	ok
mean	max	5.2	0.063	0.09	ok		mean	mean	0.3	0.223	0.14	ok
min	min	6.0	0.042	0.28	ok		max	min	0.7	0.183	0.38	ok
max	mean	7.1	0.024	0.09	ok		min	mean	1.3	0.129	0.14	ok
mean	mean	8.7	0.011	0.11	ok		max	max	2.7	0.065	0.16	ok
mean	min	9.1	0.009	0.09	ok		mean	max	3.1	0.053	0.15	ok
min	max	9.9	0.006	0.19	ok		min	max	3.5	0.043	0.16	ok
max	min	-	-	0.07	not converged		mean	min	4.0	0.035	0.42	ok
max	max	-	-	0.32	not converged		min	min	5.9	0.014	0.42	ok
Tab. S1b: Model comparison for trappings at all habitats and distances for the night period (n = 420) and the day period (n = 414) of 2019.
Delta AIC, Akaike weight and R² are shown for each combination of abiotic variables.
Night period							Day period
Temp.	Hum.	Δ(AIC)	w(AIC)	adj. R²	Comment		Temp.	Hum.	Δ(AIC)	w(AIC)	adj. R²	Comment
mean	mean	0.0	0.997	0.53	ok		max	min	0.0	1.000	0.52	ok
min	mean	11.3	0.003	0.49	ok		min	mean	36.4	< 0.001	0.66	ok
mean	min	90.9	< 0.001	0.46	ok		mean	mean	42.0	< 0.001	0.64	ok
min	min	104.6	< 0.001	0.43	ok		mean	min			0.53	not converged
min	max	-	-	0.62	not converged		min	min			0.33	not converged
mean	max	-	-	0.57	not converged		max	mean			0.51	not converged
max	mean	-	-	0.56	not converged		min	max			0.50	not converged
max	max	-	-	0.46	singular convergence		mean	max			0.57	not converged
max	min	-	-	0.47	singular convergence		max	max			0.52	not converged

## Sheet: Table S2
Significance codes for all following tables: 0 ‘***’ 0.001 ‘**’ 0.01 ‘*’ 0.05 ‘.’ 0.1 ‘ ’ 1
Tab S2a: Pond bank model for the night period (GAMM; R summary output)						Tab S2b: Pond bank model for the day period (GAMM; R summary output)
Family: Negative Binomial(3)						Family: Negative Binomial(3)
Link function: log						Link function: log
Formula: Trappings ~ s(min. Temperature, mean Humidity, k = -1) +						Formula: Trappings ~ s(max. Temperature, min. Humidity, k = -1) +
s(Days since first movement, k = -1) + offset(log(Fence length * Hours))						s(Days since first movement, k = -1) + offset(log(Fence length * Hours))
Parametric coefficients:						Parametric coefficients:
	Estimate	Std. Error	t value	Pr(>|t|)			Estimate	Std. Error	t value	Pr(>|t|)
(Intercept)	-6.0080	0.1878	-31.98	<0.0000000000000002 ***		(Intercept)	-6.0142	0.1362	-44.16	<0.0000000000000002 ***
Approximate significance of smooth terms:						Approximate significance of smooth terms:
	edf	Ref.df	F	p-value			edf	Ref.df	F	p-value
s(min. Temperature, mean Humidity)	7.547	7.547	2.288	0.0283 *		s(max. Temperature, min. Humidity)	10.383	10.383	2.617	0.00783 **
s(Days since first movement)	3.421	3.421	17.255	0.000000000889 ***		s(Days since first movement)	3.903	3.903	10.010	0.0000016 ***
R-sq.(adj) = 0.332						R-sq.(adj) = 0.375
Scale est. = 0.94796						Scale est. = 0.79208
n = 94						n = 92
Formula to calculate decline of predicted trappings with increasing distance [%]: 1-e^(Estimate)
Tab S2c: Habitat model for the night period (GAMM; R summary output)						Tab S2d: Habitat model for the day period (GAMM; R summary output)
Family: Negative Binomial(3)						Family: Negative Binomial(3)
Link function: log						Link function: log
Formula: Trappings ~ s(mean Temperature, mean Humidity, by = Habitat, k = -1) + Distance +						Formula: Trappings ~ s(max. Temperature, min. Humidity, by = Habitat, k = -1) + Distance +
s(Days since first movement, k = -1) + offset(log(Fence length * Hours))						s(Days since first movement, k = -1) + offset(log(Fence length * Hours))
Parametric coefficients:						Parametric coefficients:
	Estimate	Std. Error	t value	Pr(>|t|)			Estimate	Std. Error	t value	Pr(>|t|)
Distance = 10 m (Intercept)	-7.0327	0.2002	-35.127	< 0.0000000000000002 ***		Distance = 10 m (Intercept)	-6.4807	0.2538	-25.533	< 0.0000000000000002 ***
Distance = 20 m	-1.0672	0.1606	-6.646	0.000000000103 ***		Distance = 20 m	-1.3227	0.2324	-5.693	0.0000000245448 ***
Distance = 30 m	-2.3201	0.2478	-9.362	< 0.0000000000000002 ***		Distance = 30 m	-2.8609	0.4149	-6.895	0.0000000000216 ***
Approximate significance of smooth terms:						Approximate significance of smooth terms:
	edf	Ref.df	F	p-value			edf	Ref.df	F	p-value
s(mean. Temperature, mean. Humidity): Habitat = Field edge	2.000	2.000	6.392	0.00185 **		s(max. Temperature, min. Humidity): Habitat = Field edge	2.000	2.000	2.827	0.0604 .
s(mean. Temperature, mean. Humidity): Habitat = Copses	13.376	13.376	4.030	0.00000252504539700 ***		s(max. Temperature, min. Humidity): Habitat = Copses	2.000	2.000	3.361	0.0357 *
s(mean. Temperature, mean. Humidity): Habitat = Cereal field	2.000	2.000	2.584	0.07674 .		s(max. Temperature, min. Humidity): Habitat = Cereal field	5.114	5.114	2.609	0.0242 *
s(mean. Temperature, mean. Humidity): Habitat = Grassland	7.318	7.318	3.144	0.00251 **		s(max. Temperature, min. Humidity): Habitat = Grassland	4.222	4.222	1.850	0.1076
s(Days since first movement)	5.521	5.521	16.079	0.00000000000000205 ***		s(Days since first movement)	5.331	5.331	9.456	0.00000000901 ***
R-sq.(adj) = 0.532						R-sq.(adj) = 0.517
Scale est. = 0.99977						Scale est. = 1.2997
n = 420						n = 414

## Sheet: Table S3
Tab S3a: Pond specific fit and error measurements of the pond bank model for the night period.
MAE: Mean Absolute Error; RSE: Relative Squared Error; RMSLE: Root Mean Squared Log Error.
Pond	n	Formula	R²	RSE	MAE	RMSLE
A18	41	y = 0.00125 + 0.0768 x	0.590	1.3799243	21.827575	1.6224490
B19	24	y = 0.00269 + 0.3740 x	0.570	0.5738778	2.833518	0.5133404
C19	38	y = 0.00135 + 0.3780 x	0.580	0.5445612	2.267867	0.6240303
D19	32	y = 0.00186 + 0.5700 x	0.430	0.7998926	2.935690	0.9127096
Tab S3b: Pond specific fit and error measurements of the pond bank model for the day period.
MAE: Mean Absolute Error; RSE: Relative Squared Error; RMSLE: Root Mean Squared Log Error. *Extreme outlier removed.
Pond	n	Formula	R²	RSE	MAE	RMSLE
A18	41	y = 0.00212 + 0.00654 x	0.085	1.0973874	14.7288238	1.4619330
A18*	40	y = 0.00153 + 0.04320 x	0.360	1.2521098	8.1694778	1.2916380
B19	24	y = 0.00222 + 0.40100 x	0.530	0.4965938	1.1189543	0.4075948
C19	37	y = 0.00149 + 0.40200 x	0.580	0.4742345	0.9886286	0.4106850
D19	31	y = 0.00172 + 0.56600 x	0.600	0.5949641	1.6094503	0.6899539

## Sheet: Fig. S1
Fig. S1a: Schematic arrangement of fences and traps at distances of 1–5, 10, 20 and 30 m in different habitats.
Traps were positioned on both sides in the center of fences. The inner fence (1–5 m) was nearly fully closed.
Fig. S1b: Example of spatial fence arrangement around a pond and fence installation in detail.

## Sheet: Fig. S2
Fig. S2a: Smooth function of the pond bank model parameter							Fig. S2b: Pond specific validation of the pond bank model prediction for the night period.
"Days since first movement" for the night period.

## Sheet: Fig. S3
							Fig. S3b: Pond specific validation of the pond bank model prediction for the day period.
Fig. S3a: Smooth function of the pond bank model parameter							*Extreme outlier removed
"Days since first movement" for the day period.
								Fig.S3c: Pond specific validation of the pond bank model prediction
								for the day period at pond A18 with outlier.

## Sheet: Fig. S4
Night period								Day period
Fig. S4a: Smooth function of the habitat model parameter								Fig. S4b: Smooth function of the habitat model parameter
"Days of activity at the pond since initial movement" for the night period.								"Days of activity at the pond since initial movement" for the day period.
